# Supplementary material for: Highly solar modulated and robust PNIPAM/HEMC smart windows
Source: Royal Society of Chemistry journal article supplement (doi:10.1039/d4tc04949g), 2025-01-01
Supplement: d4tc04949g1.pdf [file d4tc04949g1.pdf]

## Supporting Information for Highly Solar Modulated and Robust PNIPAM/HEMC Smart Window

Shuming Liu<sup>a</sup>, Kai Yao<sup>a</sup>, Jiakui Xu<sup>b</sup>, Zhenhui Hu<sup>a</sup>, Xianglong Zeng<sup>a</sup>, Longhao Xiao<sup>a</sup>,  
Zheng Fang<sup>c</sup>, Yuwei Hu<sup>d</sup>, Xi Chen<sup>e</sup>, Yongsheng Yang<sup>a,\*</sup>, Wenxin Li<sup>b,\*</sup>, Yujie Ke,<sup>e,\*</sup>

<sup>a</sup> School of Chemistry and Chemical Engineering, Hubei Key Laboratory of Biomass Fibers and Eco-dyeing & Finishing, Wuhan Textile University, Wuhan 430073, China.

<sup>b</sup> School of Energy and Environment, Southeast University, Nanjing, 211189, PR China.

<sup>c</sup> Materials Science and Engineering, State Key Laboratory of New Textile Materials & Advanced Processing Technology, Wuhan Textile University, Wuhan 430200, PR China.

<sup>d</sup> Institute of Materials Research and Engineering (IMRE), Agency for Science, Technology and Research (A\*STAR), 2 Fusionopolis Way, Innovis #08-03, Singapore 138634, Republic of Singapore.

<sup>e</sup> School of Interdisciplinary Studies, Lingnan University, Tuen Mun, Hong Kong SAR, 999077, China.

Corresponding Authors

Emails: [ysyang@wtu.edu.cn](mailto:ysyang@wtu.edu.cn); [wenxinli@seu.edu.cn](mailto:wenxinli@seu.edu.cn); [yujieke@ln.edu.hk](mailto:yujieke@ln.edu.hk)

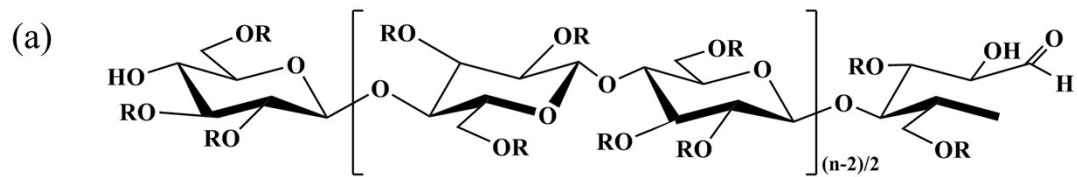

HEMC: R=H; -CH<sub>3</sub>; -[CH<sub>2</sub>CH<sub>2</sub>O]<sub>n</sub>H or -[CH<sub>2</sub>CH<sub>2</sub>O]<sub>n</sub>CH<sub>3</sub>

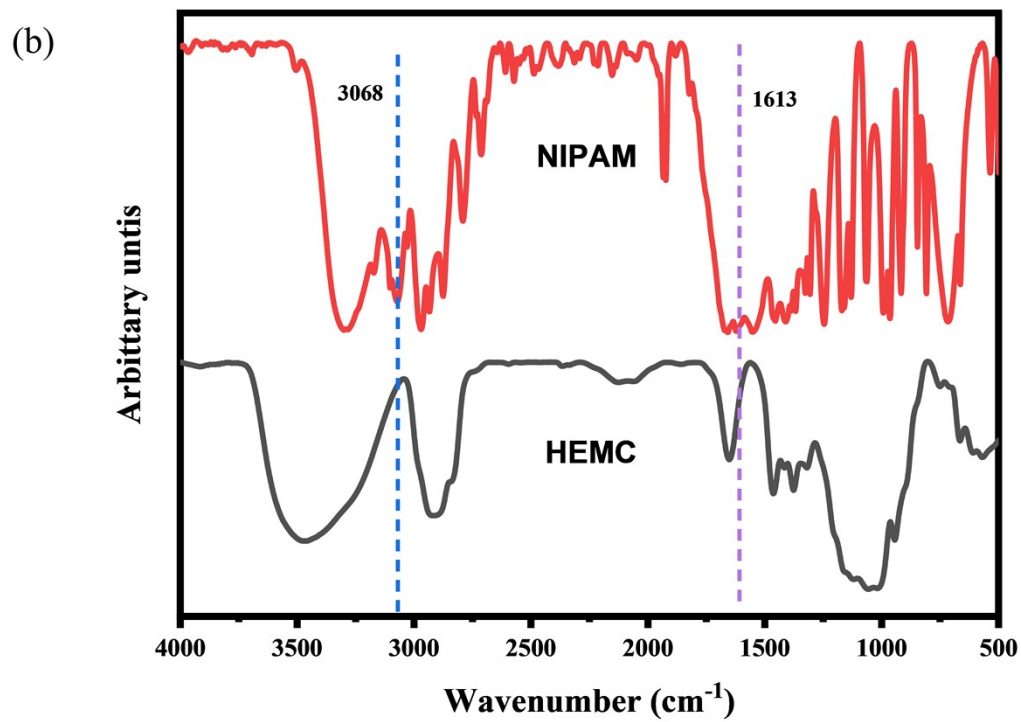

**Figure S1.** (a) Chemical structural formula of HEMC.<sup>1</sup> (b) Infrared spectra of HEMC and NIPAM.

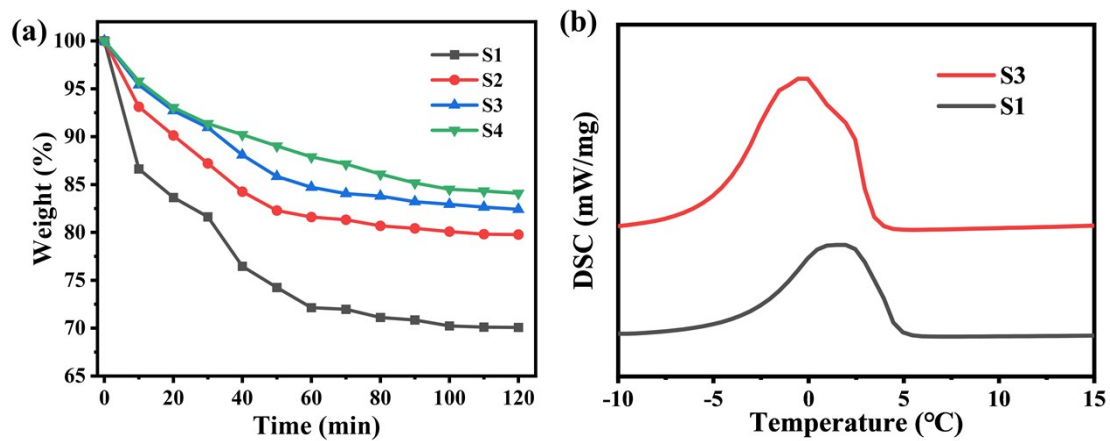

**Figure S2.** (a) Weight change of samples S1~S4 with intact sealing at 60 °C environment. (b) The low-temperature DSC test for samples S1 and S3.

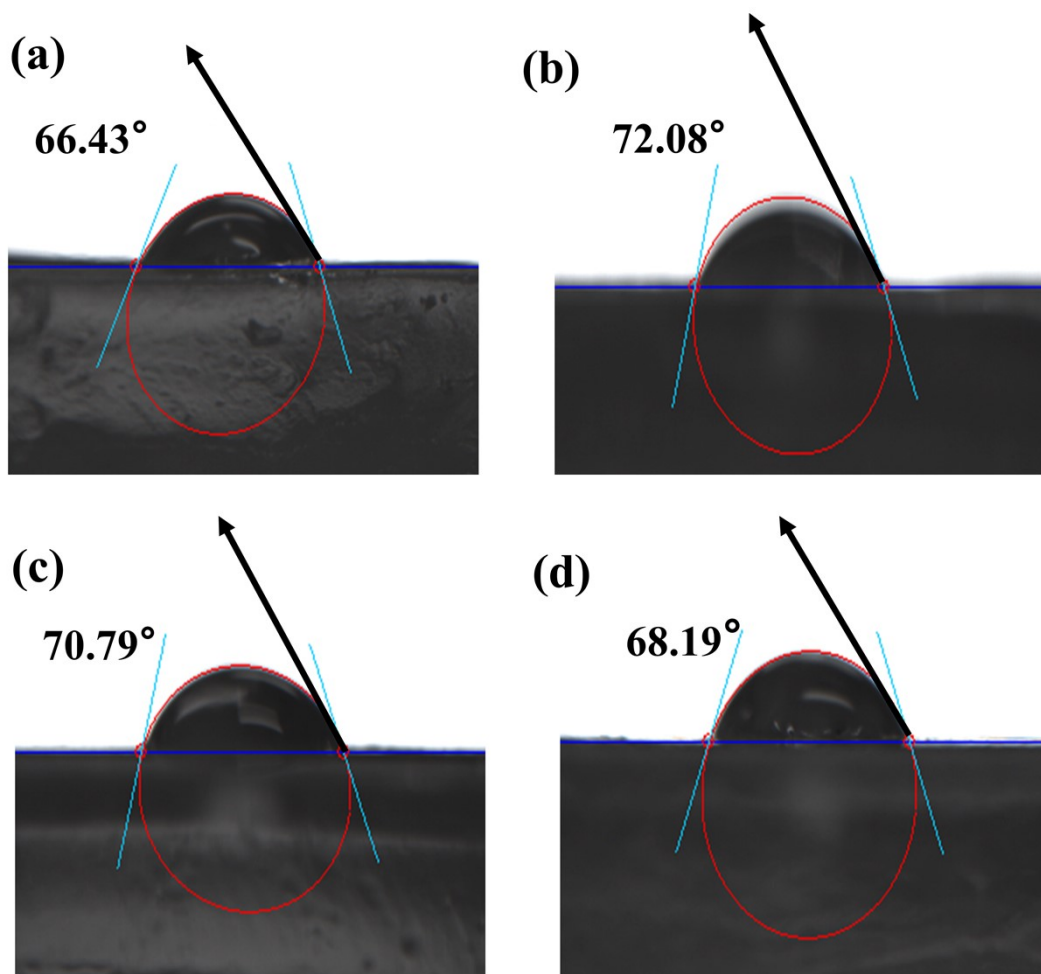

**Fig. S3.** (a) Water contact angle of S1. (b) Water contact angle of S2. (c) Water contact angle of S3. (d) Water contact angle of S4.

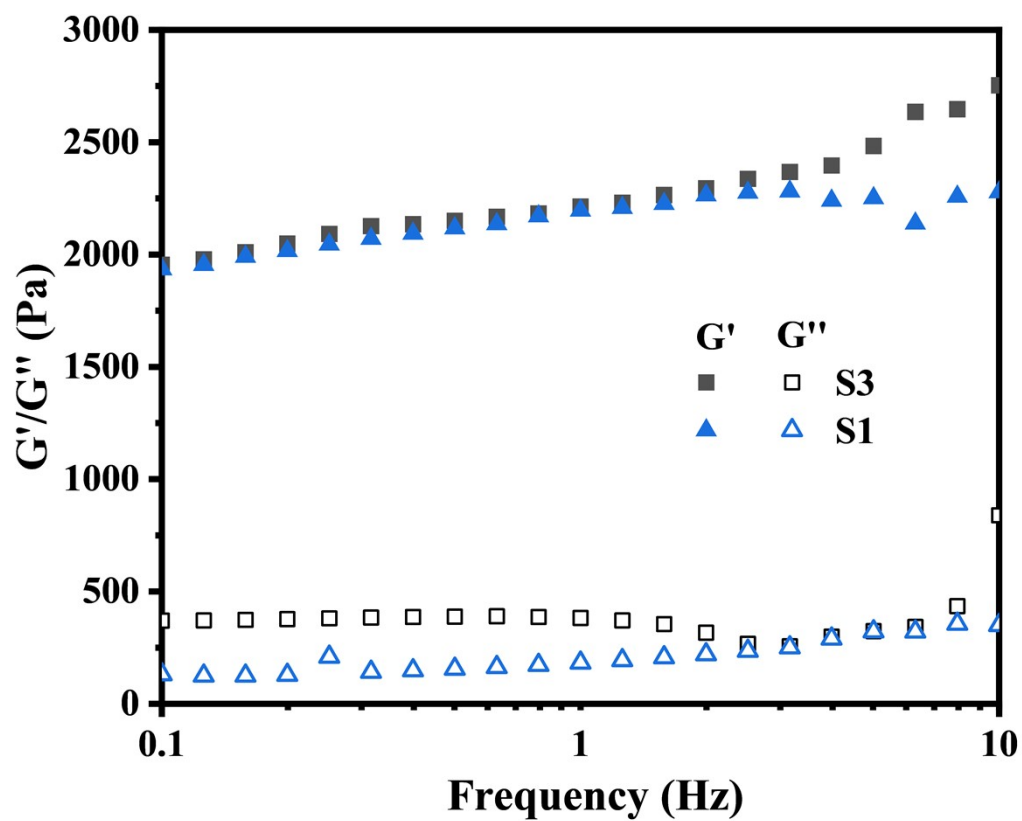

Figure S4. Frequency-sweeping rheological behavior of S1 and S3 system hydrogels.

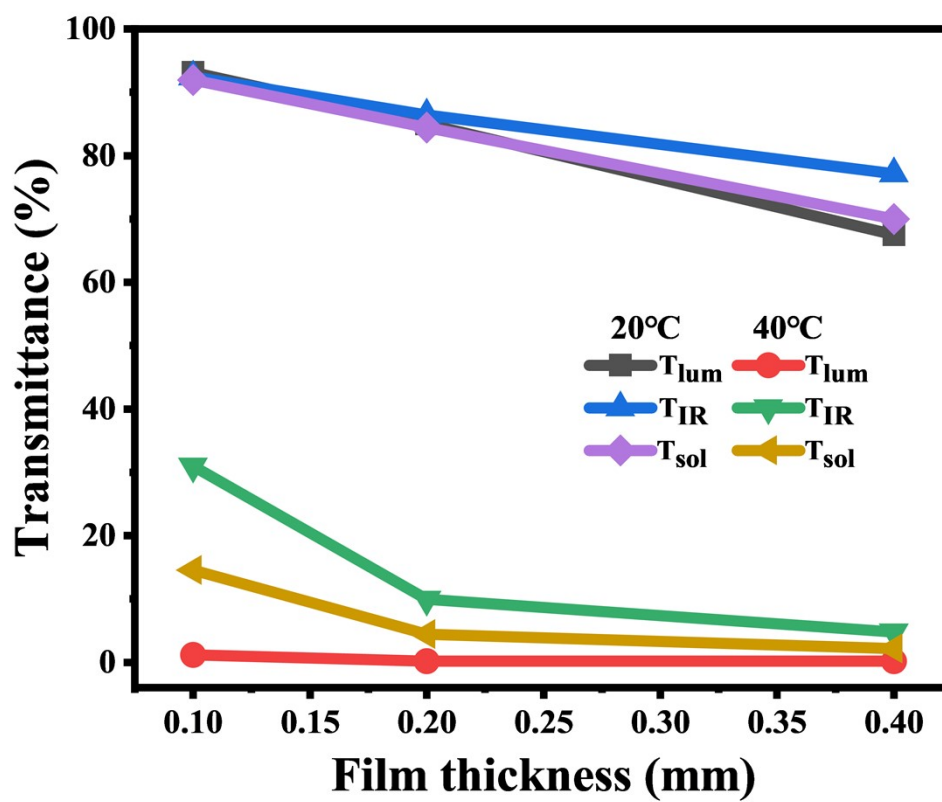

Fig. S5. Optical properties of hydrogels of different thicknesses.

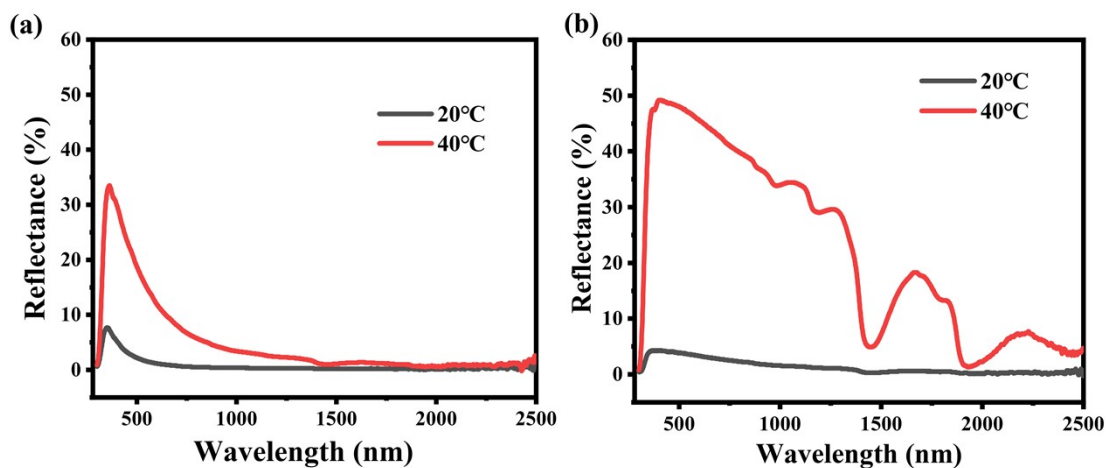

**Figure. S6.** (a) Reflectance spectra of S1 hydrogels at  $T < LCST$  and  $T > LCST$ . (b) Reflectance spectra of S3 hydrogels at  $T < LCST$  and  $T > LCST$ .

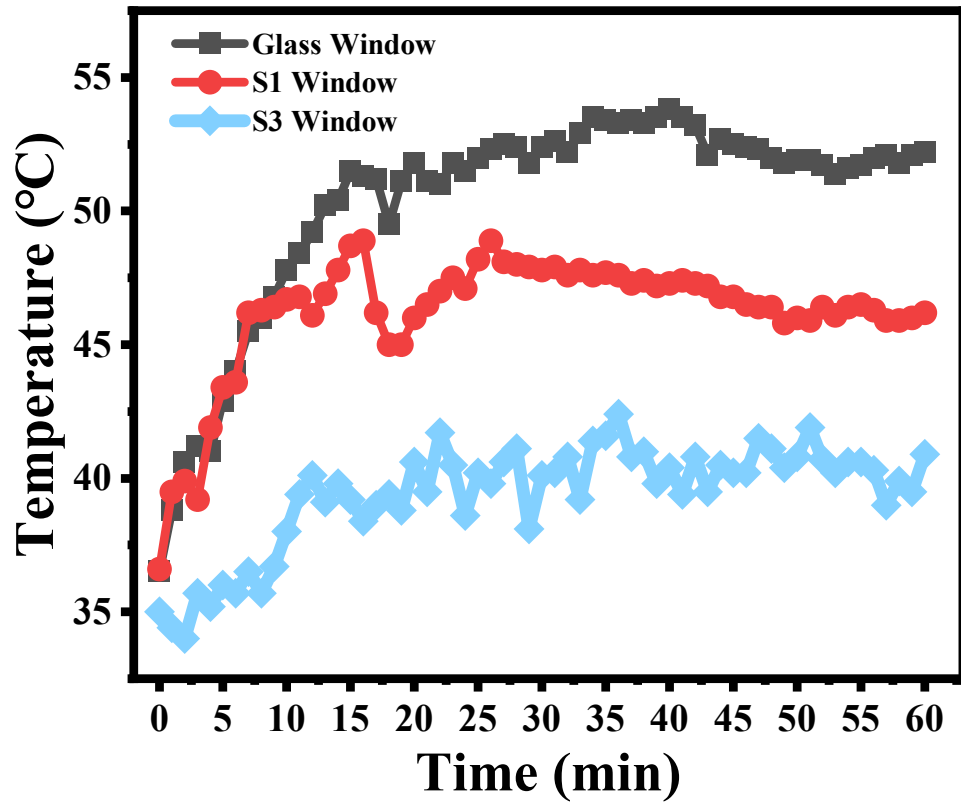

Figure. S7. Outdoor test result curve.



**Table. S1.** Substance content of S1-S4 hydrogel samples.

| Sample | NIPAM<br>(g) | MBA<br>(g) | HEMC<br>(g) | APS<br>(g) | TEMED<br>( $\mu$ l) | Water<br>(ml) |
|--------|--------------|------------|-------------|------------|---------------------|---------------|
| S1     | 1            | 0.02       | 0           | 0.02       | 13                  | 15            |
| S2     | 1            | 0.02       | 0.03        | 0.02       | 13                  | 15            |
| S3     | 1            | 0.02       | 0.05        | 0.02       | 13                  | 15            |
| S4     | 1            | 0.02       | 0.07        | 0.02       | 13                  | 15            |

**Table. S2.** Thermochromic properties of S4 hydrogels of different thicknesses.

| Thicknesses<br>(mm) | T <sub>lum</sub><br>(20°C) | T <sub>lum</sub><br>(40°C) | T <sub>sol</sub><br>(20°C) | T <sub>sol</sub><br>(40°C) | $\Delta$ T <sub>lum</sub> | $\Delta$ T <sub>sol</sub> | $\Delta$ T <sub>IR</sub> |
|---------------------|----------------------------|----------------------------|----------------------------|----------------------------|---------------------------|---------------------------|--------------------------|
| 0.4                 | 67.49                      | 0.2                        | 69.98                      | 2.16                       | 67.29                     | 67.82                     | 72.38                    |
| 0.2                 | 85.02                      | 0.21                       | 84.43                      | 4.44                       | 84.81                     | 79.99                     | 76.48                    |
| 0.1                 | 93.11                      | 1.2                        | 91.93                      | 14.52                      | 91.91                     | 77.41                     | 61.51                    |

**Table. S3.** Optical properties of the same thickness of S1~S4.

| Samples | T <sub>lum</sub><br>(20°C) | T <sub>lum</sub><br>(40°C) | T <sub>sol</sub><br>(20°C) | T <sub>sol</sub><br>(40°C) | $\Delta$ T <sub>lum</sub> | $\Delta$ T <sub>sol</sub> | $\Delta$ T <sub>IR</sub> |
|---------|----------------------------|----------------------------|----------------------------|----------------------------|---------------------------|---------------------------|--------------------------|
| S1      | 86.03                      | 56.95                      | 85.07                      | 62.28                      | 29.08                     | 22.79                     | 10.69                    |
| S2      | 87.59                      | 2.09                       | 85.94                      | 13.17                      | 85.50                     | 72.76                     | 59.70                    |
| S3      | 84.98                      | 0.66                       | 84.37                      | 9.40                       | 84.32                     | 74.97                     | 66.17                    |
| S4      | 85.02                      | 0.21                       | 84.43                      | 4.44                       | 84.81                     | 79.99                     | 76.48                    |

1. K. Liu, K. Fang, W. Chen, C. Zhang, L. Sun and J. Zhu, *Int. J. Biol. Macromol.*, 2023, **224**, 1252-1265.
